# Supplementary material for: Synthesis and structural characterization of CO2-soluble oxidizers [Bu4N]BrO3 and [Bu4N]ClO3 and their dissolution in cosolvent-modified CO2 for reservoir applications
Source: Royal Society of Chemistry journal article supplement (doi:10.1039/d0ra09563j), 2020-01-01
Supplement: d0ra09563j1.pdf [file d0ra09563j1.pdf]

## SUPPORTING INFORMATION

### **Synthesis and Structural Characterization of CO<sub>2</sub>-Soluble Oxidizers [Bu<sub>4</sub>N]BrO<sub>3</sub> and [Bu<sub>4</sub>N]ClO<sub>3</sub> and Their Dissolution in Cosolvent-Modified CO<sub>2</sub> for Reservoir Applications**

Katherine L. Hull<sup>\*,†</sup>, Desmond E. Schipper,<sup>†</sup> Allen G. Oliver<sup>‡</sup>

<sup>†</sup>Aramco Services Company: Aramco Research Center – Houston, 16300 Park Row, Houston, TX 77084, United States

<sup>‡</sup>The Department of Chemistry and Biochemistry, University of Notre Dame, Notre Dame, Indiana 46556, United States

## TABLE OF CONTENTS

|                                          |    |
|------------------------------------------|----|
| 1. Instrumentation.....                  | 1  |
| 2. Chemicals<br>used.....                | 1  |
| 3. Synthetic procedures.....             | 2  |
| 4. Single crystal x-ray diffraction..... | 3  |
| 5. DSC-TGA.....                          | 6  |
| 6. CO <sub>2</sub> Solubility Tests..... | 8  |
| 7. References.....                       | 10 |

### **Instrumentation:**

- Thermo Scientific Barnstead Smart2Pure water purification system having a resistivity of 18.2 MΩ.cm was used to generate the de-ionized water (DI-H<sub>2</sub>O) for all experimental procedures.
- A Lauda programmable recirculating silicone oil bath was used to perform the hydrothermal syntheses in the Ace Glass Pressure tubes.
- The polished samples were imaged both before and after oxidation at 1 keV using a ZEISS SIGMA VP SEM equipped with a Bruker Xflash Energy-Dispersive Spectrometer. Collection and processing of data were done using Bruker Espirit 2.1 software. EDS acquisition was performed in analytical mode with 5 nA probe current, 15 kV operating potential, 10.1 mm working distance, and 100 kcps (counts per second).
- Thermogravimetric analysis (TGA) and differential scanning calorimetry (DSC) measurements were performed on TA Instruments SDT Q600. Samples were heated at a rate of 10 °C min<sup>-1</sup> under nitrogen.
- Fourier transform infrared (FTIR) spectroscopy analysis of **1-7** was performed on an Agilent Cary 630 FTIR Spectrometer.
- Melting points of **1-4** were determined using a VWR Basic Digital Melting Point Apparatus (#75840-104).

### **Materials:**

All chemicals and solvents used in the preparation of the compounds described herein were of reagent grade and used without further purification.

**Table S1.** Summary of chemical compounds/starting reagents used in this study.

| Chemical Name                           | Formula                                           | Vendor / Catalog #         |
|-----------------------------------------|---------------------------------------------------|----------------------------|
| potassium chlorate                      | KClO <sub>3</sub>                                 | Alfa Aesar / A17075        |
| sodium bromate                          | NaBrO <sub>3</sub>                                | Fritz Industries / OB-3N   |
| barium bromate                          | Ba(BrO <sub>3</sub> ) <sub>2</sub>                | Alfa Aesar / A11008        |
| barium chlorate                         | Ba(ClO <sub>3</sub> ) <sub>2</sub>                | Aldrich / 244554           |
| tetramethylammonium sulfate             | (Me <sub>4</sub> N) <sub>2</sub> SO <sub>4</sub>  | TCI / T1240                |
| tetrabutylammonium sulfate              | (Bu <sub>4</sub> N) <sub>2</sub> SO <sub>4</sub>  | Alfa Aesar / 41723         |
| tetrabutylammonium perchlorate          | (Bu <sub>4</sub> N) <sub>2</sub> ClO <sub>4</sub> | Beantown Chemical / 213960 |
| tetrabutylammonium chloride             | (Bu <sub>4</sub> N) <sub>2</sub> Cl               | Millipore Sigma / 814645   |
| bis(triphenylphosphine)iminium chloride | [PPN]Cl                                           | Beantown Chemical / 141410 |
| tributylamine                           | Bu <sub>3</sub> N                                 | TCI / T0357                |
| dibutylamine                            | Bu <sub>2</sub> NH                                | Acros / 103524-894         |

|                            |                                                                   |                      |
|----------------------------|-------------------------------------------------------------------|----------------------|
| butylamine                 | BuNH <sub>2</sub>                                                 | Alfa Aesar / L03575  |
| carbon dioxide, industrial | CO <sub>2</sub>                                                   | Praxair / CD50S      |
| ethanol                    | CH <sub>2</sub> OH                                                | Decon Labs / 2701    |
| acetone                    | (CH <sub>3</sub> ) <sub>2</sub> CO                                | VWR / BDH1101        |
| ethyl acetate              | CH <sub>3</sub> CO <sub>2</sub> CH <sub>2</sub> CH <sub>3</sub>   | J.T. Baker / 9280-01 |
| ethyl lactate              | CH <sub>3</sub> CHCO <sub>2</sub> CH <sub>2</sub> CH <sub>3</sub> | TCI / L0003          |

### **Synthetic Methods:**

Tetrabutylammonium bromate, [Bu<sub>4</sub>N]BrO<sub>3</sub> (1). Compound 1 is prepared in high yield (99%) from the reaction of tetrabutylammonium sulfate and barium bromate. In a typical preparation, 100 mL of DI H<sub>2</sub>O in a 250 mL Erlenmeyer flask were added 0.9 g of Ba(BrO<sub>3</sub>)<sub>2</sub> (2.29 mmol), and the mixture was stirred. To this was added 2.66 g of a 50% w/w tetrabutylammonium sulfate solution (2.29 mmol). The mixture instantly turned a milky white and was allowed to stir for 3 h and then allowed to stand for 20 h before filtering to remove the BaSO<sub>4</sub>. Yield 1.66 g (99% yield). IR (cm<sup>-1</sup>),  $\nu$  = 2950 (vs), 2905 (vs), 2840 (vs), 2740 (w), 2100 (w, br), 1650 (s), 1480 (vs), 1385 (s) 1290 (w), 1250 (w), 1170 (m), 1100 (s) 1060 (s) 1020 (m), 880 (s), 800 (vs). m.p. 54 °C.

Tetrabutylammonium chlorate, [Bu<sub>4</sub>N]ClO<sub>3</sub> (2). To 100 mL of DI H<sub>2</sub>O in a 250 mL Erlenmeyer flask were added 0.76 g of Ba(ClO<sub>3</sub>)<sub>2</sub> (2.29 mmol), and the mixture was stirred. To this was added 2.66 g of a 50% w/w tetrabutylammonium sulfate solution (2.29 mmol). The mixture instantly turned a milky white and was allowed to stir for 3 h and then allowed to stand for 20 h before filtering to remove the BaSO<sub>4</sub>. The solution was then brought down to dryness *in vacuo*. Yield 0.73 g (98% yield). IR (cm<sup>-1</sup>),  $\nu$  = 2960 (m), 2935 (m), 2875 (m), 1476 (w), 1472 (w), 1381 (w), 1650 (s), 954 (vs), 930 (vs), 881 (m), 800 (w), 740 (m). m.p. 116-118 °C.

Bis(triphenylphosphine)iminium bromate, [PPN]BrO<sub>3</sub> (3). 4.0 g of NaBrO<sub>3</sub> (26.5 mmol) were dissolved in 30 mL of deionized H<sub>2</sub>O in a 120 mL glass tube. To this solution was added 1.0 g [PPN]Cl (1.86 mmol) and the solution heated at 100 °C for 15 minutes without stirring. Over the course of this time, a liquid formed and collected at the bottom of the tube. Upon cooling, this material crystallized and was isolated by filtration. Recrystallization of this material in 15 mL DI H<sub>2</sub>O yielded 0.88 g of [PPN]BrO<sub>3</sub> (71% yield). IR (cm<sup>-1</sup>),  $\nu$  = 3170 (w) 3150 (w) 3040 (s) 3010 (s), 2990 (s) 2700 (w) 2600 (w) 2230 (w) 2100 (w), 2080 (w), 2050 (w) 2000 (w), 1900 (w), 1830 (w), 1800 (w), 1780 (w) 1670 (w) 1600 (vs), 1480 (vs), 1420 (vs) 1300 (vs, br), 1190 (vs) 1100 (vs), 1020 (vs), 1000 (vs) 930 (w), 840 (vs), 790 (vs). m.p. 236-238 °C (dec.).

Bis(triphenylphosphine)iminium chlorate, [PPN]ClO<sub>3</sub> (4). 0.9 g of KClO<sub>3</sub> (7.43 mmol) were dissolved in 25 mL of deionized H<sub>2</sub>O in a 120 mL glass tube. To this solution was added 1.0 g [PPN]Cl (1.86 mmol) and the solution heated at 100 °C for 20 minutes. Upon cooling, the solution precipitated a large amount of white solid which was the isolated by filtration. This solid was recrystallized in 15 mL DI H<sub>2</sub>O yielding 0.96 g of [PPN]ClO<sub>3</sub> (83% yield). IR (cm<sup>-1</sup>),  $\nu$  = 3180 (w), 3150 (w), 3090 (s), 3060 (s), 3020 (m), 2990 (m), 2970 (w), 2700 (w), 2230 (w), 2080 (w), 1990 (w), 1900 (m), 1840 (w), 1780 (w), 1680 (w), 1590 (s), 1480 (vs), 1440 (vs), 1330 (vs), 1240 (vs), 1190 (vs), 1105 (vs), 1020 (vs), 970 (vs), 850 (m), 810 (vs). m.p. 237 °C (dec.).

Tributylammonium bromate,  $[\text{Bu}_3\text{NH}]\text{BrO}_3$  (5). To 20 mL of DI  $\text{H}_2\text{O}$  in a 125 mL Erlenmeyer flask was added 0.5 mL (2.1 mmol) of tributylamine. To this mixture was added 57  $\mu\text{L}$  of 98%  $\text{H}_2\text{SO}_4$  (1.1 mmol) and the resulting mixture sonicated for 5 minutes. Separately, 0.42 g (1.1 mmol) of barium bromate were added to 80 mL of DI  $\text{H}_2\text{O}$  and sonicated for 5 minutes to encourage dissolution. Then, the tributylammonium sulfate solution was added to the barium bromate solution with rapidity. The resulting mixture was sonicated for 30 minutes and vacuum filtered twice to give a clear solution from which the water was removed under vacuum. The product is a colorless liquid at room temperature. IR ( $\text{cm}^{-1}$ ),  $\nu = 3430$  (m, br), 2960 (st), 2935 (m), 2873 (m), 1722 (vw), 1628 (m), 1460 (m), 1381 (w), 1066 (w), 786 (vs, sh), 768 (vs), 740 (s, sh).

Dibutylammonium bromate,  $[\text{Bu}_2\text{NH}_2]\text{BrO}_3$  (6). To 20 mL of DI  $\text{H}_2\text{O}$  in a 125 mL Erlenmeyer flask was added 0.5 mL (3.3 mmol) of dibutylamine. To this mixture was added 88  $\mu\text{L}$  of 98%  $\text{H}_2\text{SO}_4$  (1.6 mmol) and the resulting mixture sonicated for 5 minutes. Separately, 0.64 g (1.6 mmol) of barium bromate were added to 80 mL of DI  $\text{H}_2\text{O}$  and sonicated for 5 minutes to encourage dissolution. Then, the dibutylammonium sulfate solution was added to the barium bromate solution with rapidity. The resulting mixture was sonicated for 30 minutes and vacuum filtered twice to give a clear solution from which the water was removed under vacuum. The product is a colorless liquid at room temperature. IR ( $\text{cm}^{-1}$ ),  $\nu = 3430$  (m, br), 2960 (st), 2935 (m), 2873 (m), 1722 (vw), 1628 (m), 1617 (m), 1460 (m), 1381 (w), 1066 (w), 915 (w), 780 (vs), 727 (vs). m.p. 4  $^\circ\text{C}$ .

Butylammonium bromate,  $[\text{BuNH}_3]\text{BrO}_3$  (7). To 20 mL of DI  $\text{H}_2\text{O}$  in a 125 mL Erlenmeyer flask was added 0.33 mL (3.3 mmol) of butylamine. To this mixture was added 88  $\mu\text{L}$  of 98%  $\text{H}_2\text{SO}_4$  (1.6 mmol) and the resulting mixture sonicated for 5 minutes. Separately, 0.64 g (1.6 mmol) of barium bromate were added to 80 mL of DI  $\text{H}_2\text{O}$  and sonicated for 5 minutes to encourage dissolution. Then, the butylammonium sulfate solution was added to the barium bromate solution with rapidity. The resulting mixture was sonicated for 30 minutes and vacuum filtered twice to give a clear solution from which the water was removed under vacuum. Yield: 0.65 g (97%). IR ( $\text{cm}^{-1}$ ),  $\nu = 3041$  (st, br), 2960 (st), 2935 (m), 2875 (m), 1606 (m), 1600 (m), 1570 (s), 1174 (m), 1077 (m), 915 (m), 830 (s), 768 (vs), 757 (vs).

Tetramethylammonium bromate,  $[\text{Me}_4\text{N}]\text{BrO}_3$  (8). To 100 mL of DI  $\text{H}_2\text{O}$  in a 250 mL Erlenmeyer flask was added 0.9 g of  $\text{Ba}(\text{BrO}_3)_2$  (2.29 mmol), and the mixture was stirred. To this was added 0.559 g (2.29 mmol) tetramethylammonium sulfate dissolved in 5 mL DI water. The mixture instantly turned a milky white and was allowed to stir for 3 h and then allowed to stand for 20 h before filtering to remove the  $\text{BaSO}_4$ . Yield 0.62 g (97% yield).

### **X-ray Diffraction:**

An arbitrary sphere of data was collected on each crystal on either a Bruker PHOTON-II or Bruker APEX-II diffractometer using a combination of  $\omega$ - and  $\phi$ -scans of  $0.5^\circ$  [1]. Data were corrected for absorption and polarization effects [2] and analyzed for space group determination [1]. The structures were solved by dual-space methods and expanded routinely [3]. The model was refined by full-matrix least-squares analysis of  $F^2$  against all reflections [4]. All non-hydrogen atoms were refined with anisotropic atomic displacement parameters. Hydrogen atoms were included in calculated positions. Atomic displacement parameters for the hydrogens were tied to the equivalent

isotropic displacement parameter of the atom to which they are bonded ( $U_{\text{iso}}(\text{H}) = 1.5U_{\text{eq}}(\text{C})$  for methyl,  $1.2U_{\text{eq}}(\text{C})$  for all others). Disorder in the butyl chain and chlorine position in the anion for compound 4 was treated routinely, with locations for the minor component disorder atoms model on locations observed in difference Fourier maps. In the final model, the occupancies of the two components were summed to unity yielding ratios of 0.88:0.11 and 0.87:0.13 for the butyl chain and chlorine sites, respectively. The minor component atoms sites were modeled with isotropic displacement parameters. Modeling this disorder improved the overall structural model.

**Table S2.** Crystallographic data for 1-4.

|                                                  | 1                                         | 2                                         | 3                                                   | 4                                                   |
|--------------------------------------------------|-------------------------------------------|-------------------------------------------|-----------------------------------------------------|-----------------------------------------------------|
| Formula                                          | $\text{C}_{16}\text{H}_{38}\text{BrNO}_4$ | $\text{C}_{16}\text{H}_{36}\text{ClNO}_3$ | $\text{C}_{36}\text{H}_{30}\text{BrNO}_3\text{P}_2$ | $\text{C}_{36}\text{H}_{30}\text{ClNO}_3\text{P}_2$ |
| FW [g mol <sup>-1</sup> ]                        | 388.38                                    | 325.91                                    | 666.46                                              | 622.00                                              |
| T [K]                                            | 120(2)                                    | 120(2)                                    | 120(2)                                              | 120(2)                                              |
| $\lambda_{\text{MoK}\alpha}$ [Å]                 | 0.71073                                   | 0.71073                                   | 0.71073                                             | 0.71073                                             |
| Crystal system                                   | Monoclinic                                | Monoclinic                                | Monoclinic                                          | Monoclinic                                          |
| Space group                                      | $P2_1/n$                                  | $P2_1/n$                                  | $P2_1/n$                                            | $P2_1/n$                                            |
| <i>a</i> [Å]                                     | 9.8000(4)                                 | 12.0476(16)                               | 9.4724(4)                                           | 9.4093(11)                                          |
| <i>b</i> [Å]                                     | 12.7411(5)                                | 24.535(3)                                 | 19.7442(9)                                          | 19.713(2)                                           |
| <i>c</i> [Å]                                     | 16.7622(6)                                | 14.501(2)                                 | 16.8171(7)                                          | 16.8064(19)                                         |
| $\alpha$ [°]                                     | 90                                        | 90                                        | 90                                                  | 90                                                  |
| $\beta$ [°]                                      | 100.0239(13)                              | 114.010(2)                                | 103.8180(13)                                        | 103.680(4)                                          |
| $\gamma$ [°]                                     | 90                                        | 90                                        | 90                                                  | 90                                                  |
| <i>V</i> [Å <sup>3</sup> ]                       | 2061.03(14)                               | 3915.4(9)                                 | 3054.2(2)                                           | 3028.9(6)                                           |
| <i>Z</i>                                         | 4                                         | 8                                         | 4                                                   | 4                                                   |
| $\rho_{\text{calc}}$ [g cm <sup>-3</sup> ]       | 1.252                                     | 1.106                                     | 1.449                                               | 1.364                                               |
| $\mu$ [mm <sup>-1</sup> ]                        | 2.010                                     | 0.205                                     | 1.489                                               | 0.270                                               |
| <i>F</i> (000)                                   | 832                                       | 1440                                      | 1368                                                | 1296                                                |
| Color / Habit                                    | colorless, block                          | colorless, block                          | colorless, block                                    | colorless, tablet                                   |
| Size [mm]                                        | 0.343 × 0.159 × 0.134                     | 0.251 × 0.241 × 0.145                     | 0.281 × 0.092 × 0.078                               | 0.221 × 0.194 × 0.054                               |
| $\theta$ Min-Max [°]                             | 2.019 - 28.273                            | 1.660 - 28.349                            | 1.618 - 28.213                                      | 1.619 - 28.319                                      |
| Dataset                                          | -13:13; -16:16; -22:22                    | -16:16; -32:32; -19:19                    | -12:12; -26:26; -22:22                              | -12:12; -26:25; -22:22                              |
| Reflections collected                            | 40837                                     | 75236                                     | 61375                                               | 60453                                               |
| Independent reflections                          | 5101 [ $R_{\text{int}} = 0.0380$ ]        | 9754 [ $R_{\text{int}} = 0.0341$ ]        | 7529 [ $R_{\text{int}} = 0.0456$ ]                  | 7533 [ $R_{\text{int}} = 0.0544$ ]                  |
| Completeness to $\theta = 25.242^\circ$          | 100.0%                                    | 100.0%                                    | 100.0%                                              | 100.0%                                              |
| Absorption correction                            | Numerical                                 | Numerical                                 | Numerical                                           | Numerical                                           |
| Max and min transmission                         | 1.0000 and 0.6902                         | 0.7844 and 0.7012                         | 0.9871 and 0.7891                                   | 1.0000 and 0.9372                                   |
| Data / restraints / parameters                   | 5101 / 0 / 211                            | 9754 / 0 / 443                            | 7529 / 0 / 388                                      | 7533 / 0 / 388                                      |
| GooF                                             | 1.026                                     | 1.025                                     | 1.049                                               | 1.109                                               |
| Final R indices [ $I > 2\sigma(I)$ ]             | $R_1 = 0.0244$ , $wR_2 = 0.0538$          | $R_1 = 0.0447$ , $wR_2 = 0.1113$          | $R_1 = 0.0307$ , $wR_2 = 0.0663$                    | $R_1 = 0.0486$ , $wR_2 = 0.1078$                    |
| R indices (all data)                             | $R_1 = 0.0325$ , $wR_2 = 0.0571$          | $R_1 = 0.0602$ , $wR_2 = 0.1210$          | $R_1 = 0.0393$ , $wR_2 = 0.0701$                    | $R_1 = 0.0604$ , $wR_2 = 0.1130$                    |
| Extinction coefficient                           | n/a                                       | n/a                                       | n/a                                                 | n/a                                                 |
| Largest diff. peak, hole [ $e^- \text{Å}^{-3}$ ] | 0.320, -0.256                             | 0.703, -0.368                             | 0.449, -0.447                                       | 0.532, -0.404                                       |
| CCDC                                             | 2039678                                   | 2039679                                   | 2039680                                             | 2039681                                             |

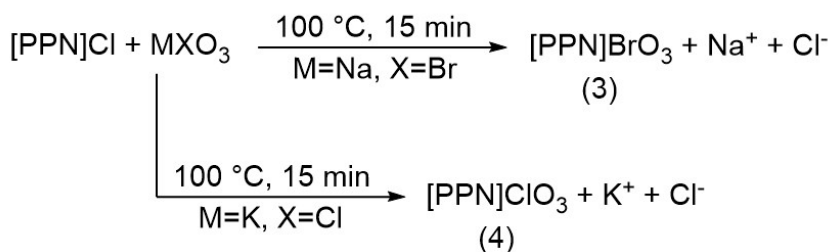

**Scheme S1.** Synthesis of PPN bromate/chlorate

The salts, bis(triphenylphosphine)iminium bromate (**3**) and chlorate (**4**), crystallize as colorless block-like crystals, and the compounds are isostructural. Figure S1 shows the crystal structures of the two compounds. There are four molecules of the PPN cation and bromate/chlorate anion in each of the unit cells of the primitive, centrosymmetric, monoclinic space group  $P2_1/n$ . The structures of  $[\text{PPN}]\text{BrO}_3$  and  $[\text{PPN}]\text{ClO}_3$  are as expected. No exceptional bond metrics were observed within the molecules. Two bromate and chlorate oxygen atoms are oriented towards their respective cationic nitrogen centers. This electrostatic interaction likely dominates the structural arrangement of the oxidizing anions with respect to  $[\text{PPN}]^+$ . A secondary, weaker interaction is observed between chlorine and bromine lone pairs and the closest phenyl substituent.

The chlorine and bromine atoms are centered above three carbon atoms of the phenyl rings, with the closest  $\text{Cl}\cdots\text{C}$  and  $\text{Br}\cdots\text{C}$  contacts of 3.536(2) and 3.559(2) Å, respectively. Lone pair- $\pi$  interactions have been reported for related systems (ethane-1,2-diyl)bis(triphenylphosphonium) dichlorate<sup>5</sup> and  $[(\text{Co}(\text{phen})_2\text{CO}_3)\text{ClO}_3]$  and  $[\text{Co}(\text{phen})_2\text{CO}_3]\text{BrO}_3$ .<sup>6</sup>

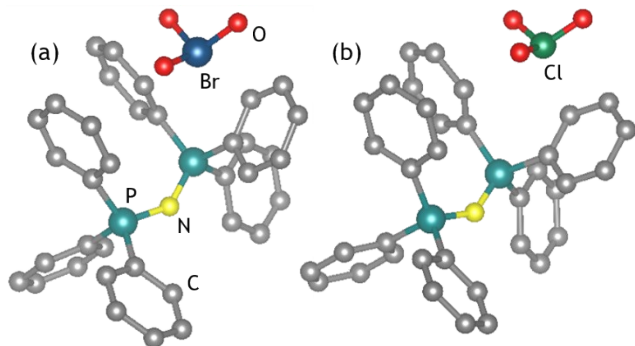

**Figure S1.** Crystal structures of (a)  $[\text{PPN}]\text{BrO}_3$  (**3**) and (b)  $[\text{PPN}]\text{ClO}_3$  (**4**).

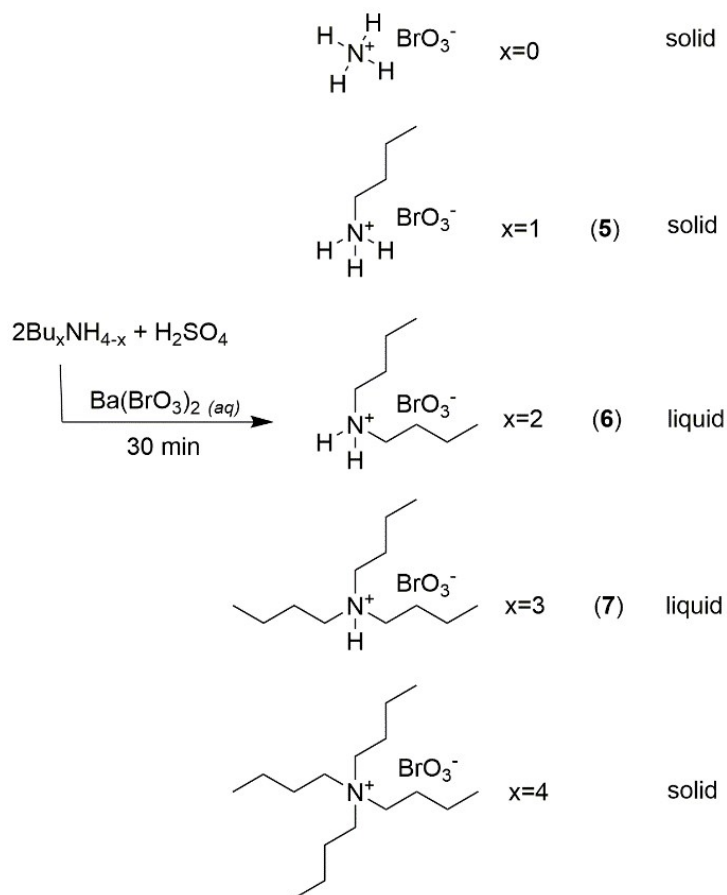

**Scheme S2.** Synthesis of butylammonium bromates series.

### Thermogravimetric Analysis:

[PPN] $\text{BrO}_3$  and [PPN] $\text{ClO}_3$  were stable while heating to 238 °C and 279 °C, respectively, where an abrupt ~14% mass loss was accompanied by a strong exotherm for each. The spectra are shown in Figures S2 and S3. The resultant products were stable upon further heating to ~350 °C, where further decomposition initiated and continued until approximately 70% additional mass loss occurred. Final masses for each were in the range of 10-15% after heating to 1000 °C. The exotherms suggest the oxidation of PPN's nitrogen atom to  $\text{NO}_x$  and concomitant gas evolution. Given the anaerobic conditions, it is unlikely that triphenylphosphine oxide forms during this exothermic reaction, particularly since evaporation is not observed at its melting point of 360 °C. Triphenylphosphonium bromide/chloride formation is also ruled out as it can be thermolyzed at relatively low temperature in refluxing xylene (140 °C).<sup>62</sup> While heating [PPN] $\text{BrO}_3$  in a capillary tube in the melting point apparatus, an orange color is observed just before reaching 240 °C, suggesting formation of bromine as the bromate reacts and is reduced.

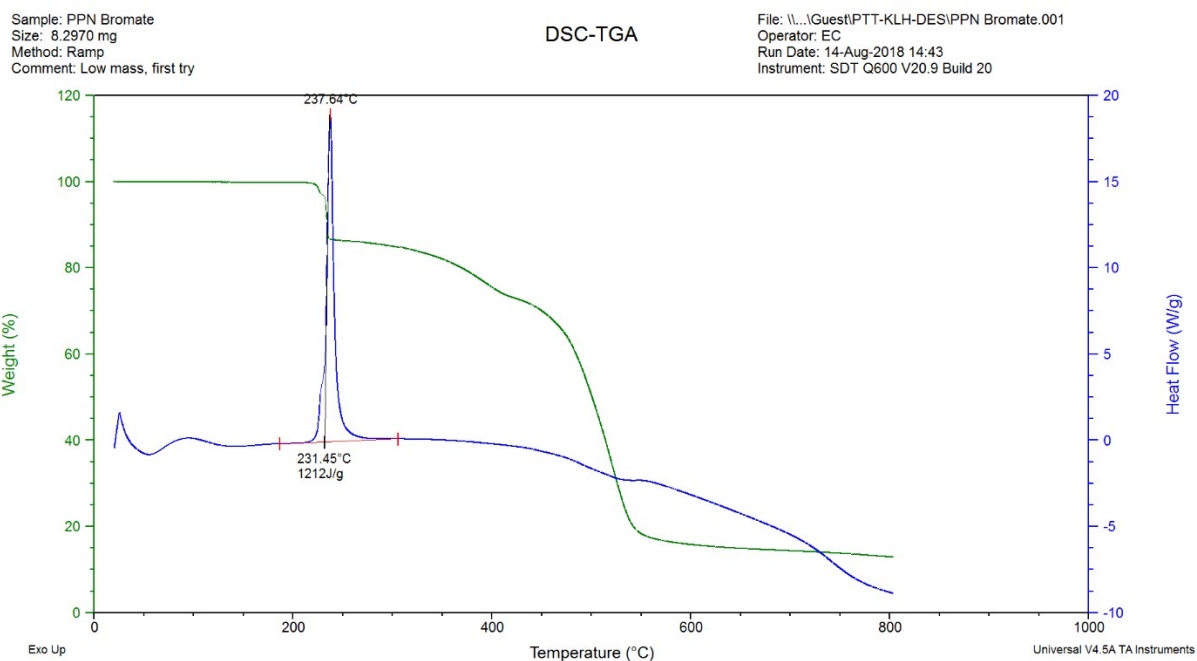

**Figure S2.** TGA of [PPN]BrO<sub>3</sub>

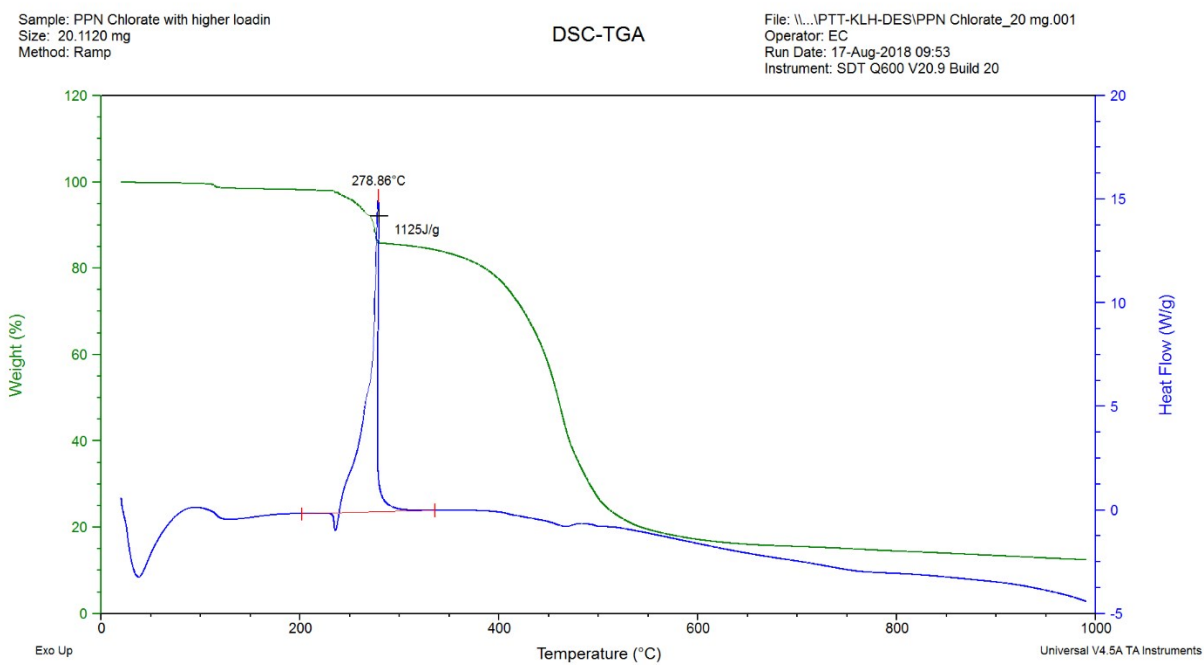

**Figure S3.** TGA of [PPN]ClO<sub>3</sub>

**Table S3.** Melting points of [Bu<sub>4</sub>N]X salts.

| Anion, X                                    | m.p. (°C) |
|---------------------------------------------|-----------|
| BrO <sub>3</sub> <sup>-</sup>               | 54        |
| F <sup>-</sup>                              | 58-60     |
| Cl <sup>-</sup>                             | 83-86     |
| Br <sup>-</sup>                             | 103       |
| ClO <sub>3</sub> <sup>-</sup>               | 116-118   |
| I <sup>-</sup>                              | 141-143   |
| H <sub>2</sub> PO <sub>4</sub> <sup>-</sup> | 151-154   |
| HSO <sub>4</sub> <sup>-</sup>               | 168-172   |
| PF <sub>6</sub> <sup>-</sup>                | 244-246   |

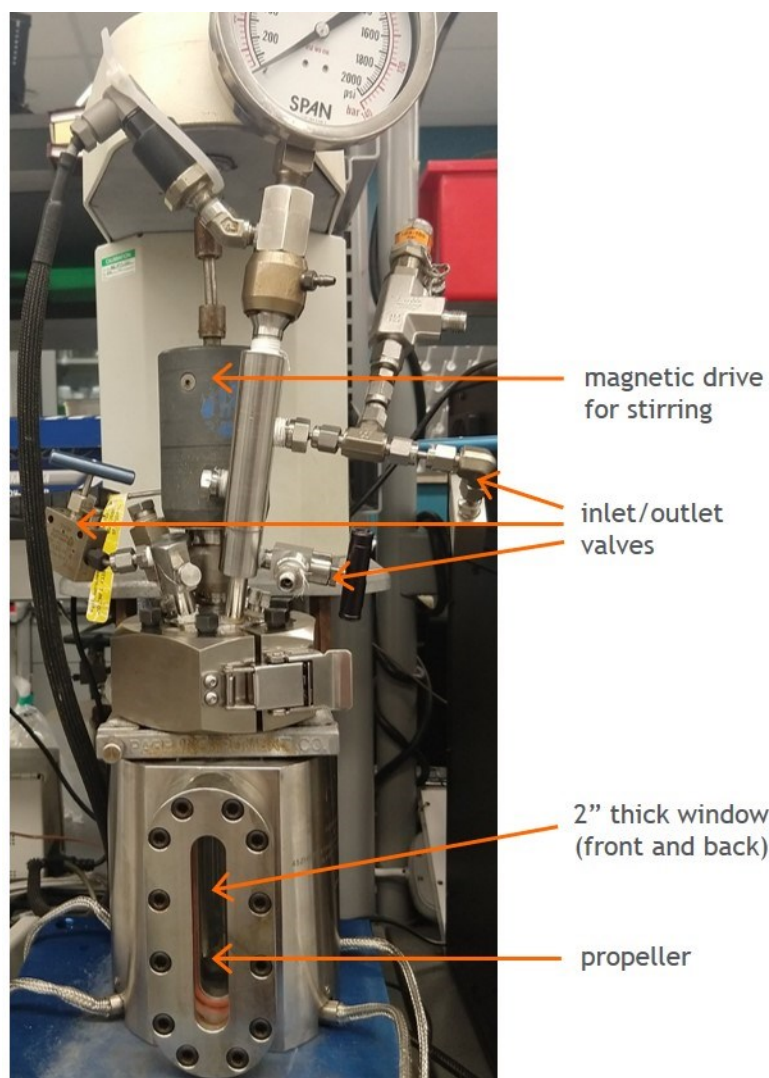

**Figure S4.** Parr reactor with see-through windows. The autoclave is equipped with Hastelloy wetted parts and can be operated up to 1900 psi and 200 °C.

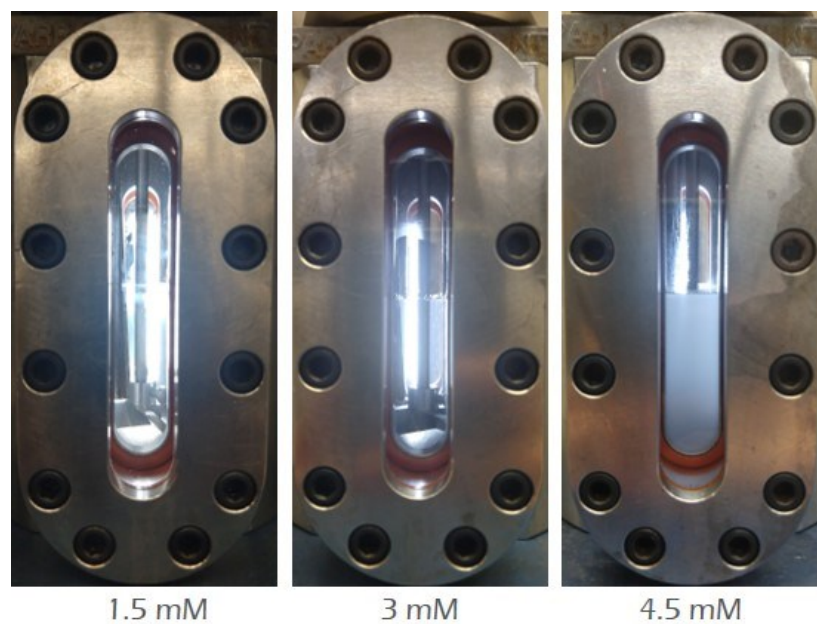

**Figure S5.** Solubility tests of varying concentrations of  $[\text{Bu}_4\text{N}]\text{BrO}_3$  in  $\text{CO}_2$  modified with 4 mol% ethanol.

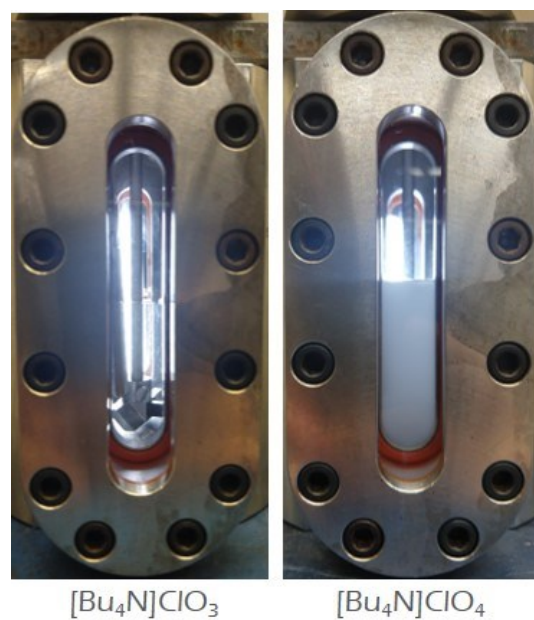

**Figure S6.** Solubility tests of 0.75 mM  $[\text{Bu}_4\text{N}]\text{ClO}_3$  and 0.75 mM  $[\text{Bu}_4\text{N}]\text{ClO}_4$  in  $\text{CO}_2$  modified with 4 mol% ethanol.

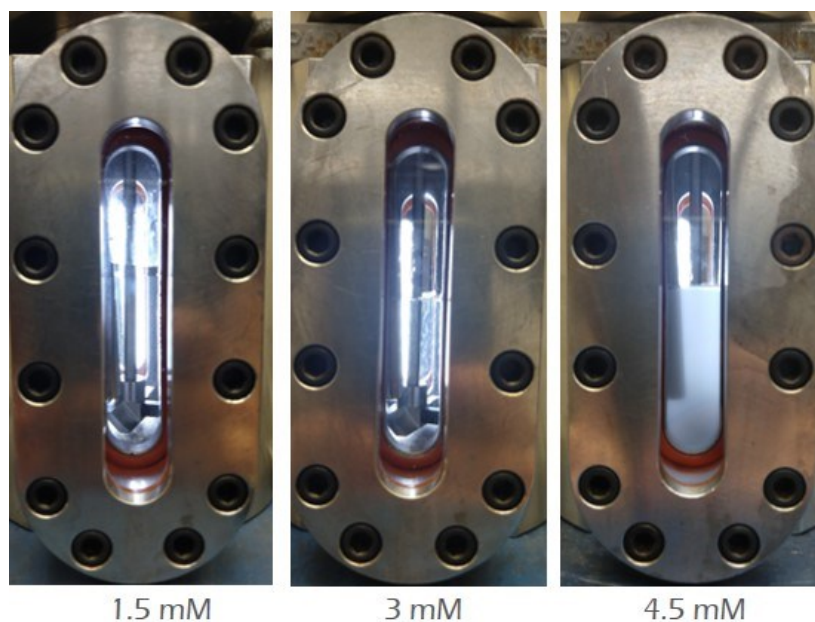

**Figure S7.** Solubility tests of varying concentrations of  $[\text{Bu}_4\text{N}]\text{Cl}$  in  $\text{CO}_2$  modified with 4 mol% ethanol.

### References:

- [1] *APEX-3*. Bruker AXS. Madison, Wisconsin, USA. **2016**.
- [2] L. Krause, R. Herbst-Irmer, G. M. Sheldrick, & D. Stalke. *J. Appl. Crystallogr.* **2015** 48, 3.
- [3] G. M. Sheldrick. *Acta Crystallogr.*, **2015**, A71, 3.
- [4] G. M. Sheldrick. *Acta Crystallogr.*, **2015**, C71, 3.
- [5] R. Salmasi, A. Salimi, M. Gholizadeh, M. Rahmani and J. C. Garrison, Symmetric quaternary phosphonium cation and perchlorate/chlorate anions: Crystal structure, Database study and Hirshfeld surface analysis, *J. Mol. Str.*, 2019, **1179**, 549–557.
- [6] R. P. Sharma, R. Bala, R. Sharma and V. Ferretti, Binding of inorganic oxo-anions to cationic cobaltamine: Synthesis, characterization, X-ray structures determination and DFT calculations of  $[\text{Co}(\text{NH}_3)_6]\text{Cl}_2(\text{ClO}_3)$ ,  $[\text{Co}(\text{NH}_3)_6]\text{Br}_2(\text{ClO}_3)$  and  $[\text{Co}(\text{NH}_3)_6]\text{Cl}_2(\text{IO}_3) \cdot \text{H}_2\text{O}$ , *Inorg. Chim. Acta*, 2005, **358**, 3457–3464.
